# Supplementary material for: High solid-state photoluminescence quantum yield of carbon-dot-derived molecular fluorophores for light-emitting devices
Source: Royal Society of Chemistry journal article supplement (doi:10.1039/d4nr01672f), 2024-01-01
Supplement: d4nr01672f1.pdf [file d4nr01672f1.pdf]

Electronic Supporting Information

## High Solid-State Photoluminescence Quantum Yield of Carbon-Dot-Derived Molecular Fluorophores for Light-Emitting Devices†

Nasir Javed,<sup>\*ab</sup> Haydee Pacheco,<sup>a</sup> Sneha Sreekumar,<sup>c</sup> Jinyu Chong,<sup>c</sup> Zhongkai Cheng <sup>c</sup> and Deirdre O'Carroll<sup>\*ac</sup>

- a. Department of Materials Science and Engineering, Rutgers, The State University of New Jersey, 607 Taylor Road, Piscataway, NJ 08854, USA.
- b. Faculty of Engineering Sciences, Ghulam Ishaq Khan Institute of Engineering Sciences and Technology, Topi, 23460, Khyber Pakhtunkhwa, Pakistan.
- c. Department of Chemistry and Chemical Biology, Rutgers, The State University of New Jersey, 123 Bevier Road, Piscataway, NJ 08854, USA

E-mail: Deirdre O'Carroll: ocarroll@rutgers.edu

E-mail: Nasir Javed: nasir.javed@rutgers.edu

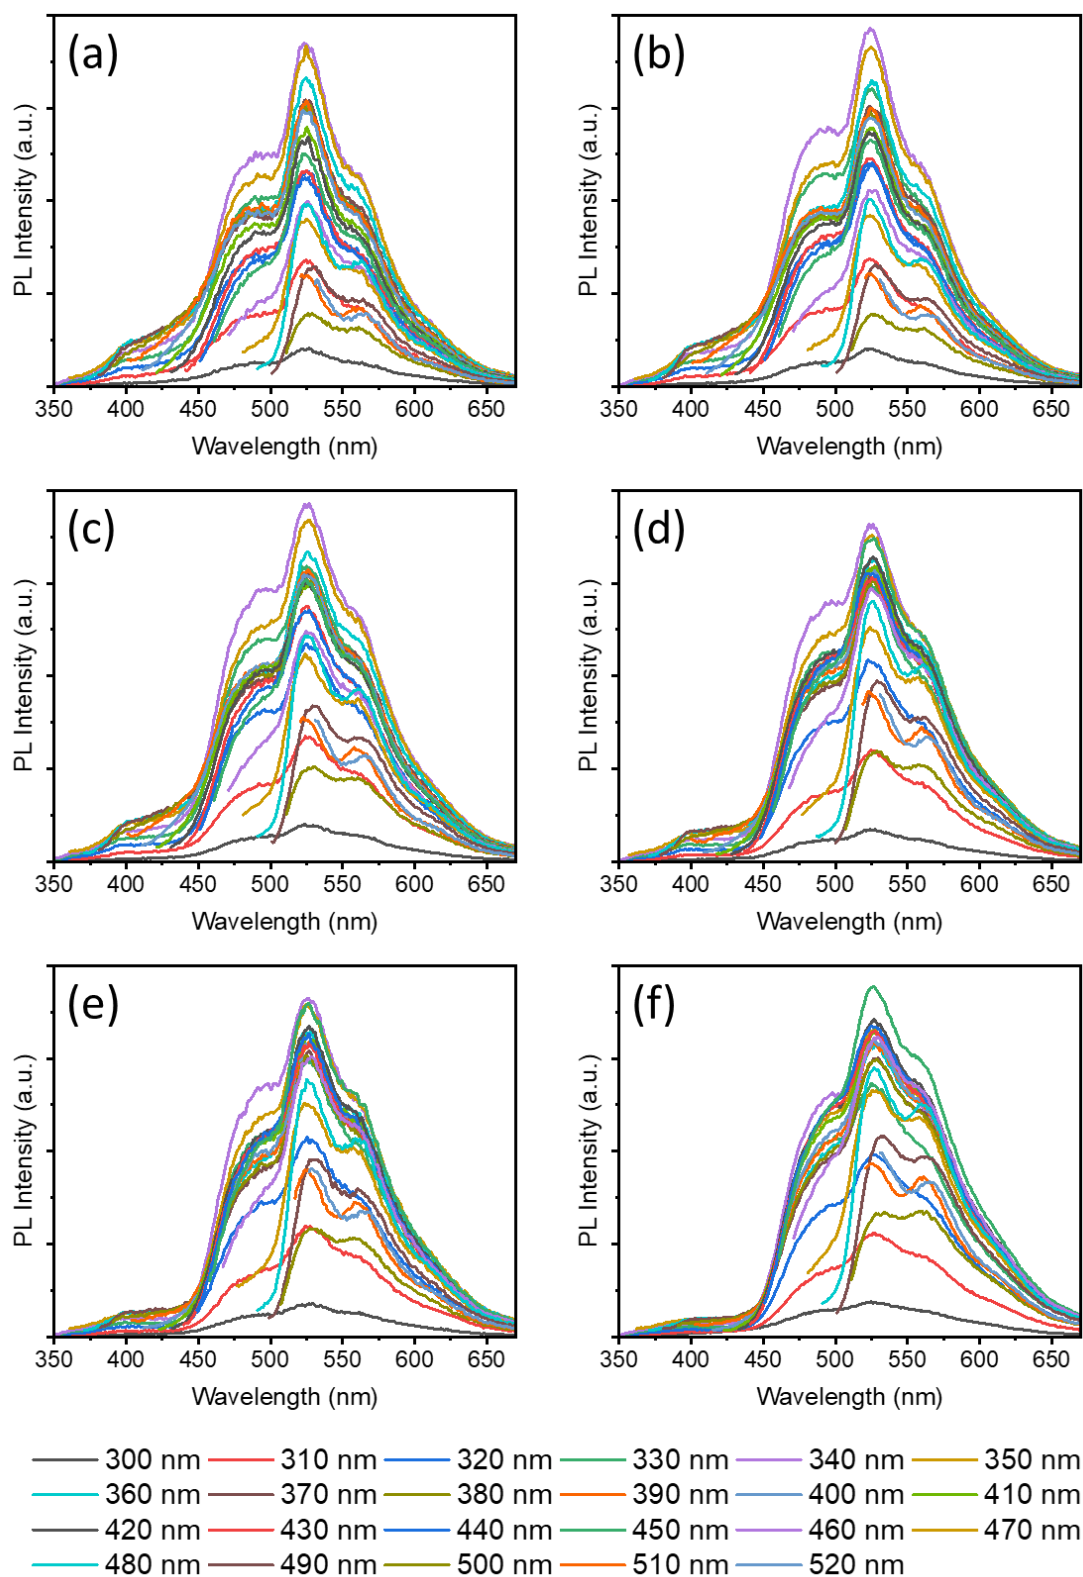

**Figure S1:** PL Emission spectra of BPD mixed in Epoxy at different concentrations (a) 0.10 wt. %, (b) 0.25 wt. %, (c) 0.50 wt. %, (d) 0.75 wt. %, (e) 1.00 wt. %, and (g) 2.00 wt. % recorded using different excitation wavelengths ranging from 300 nm to 520 nm.

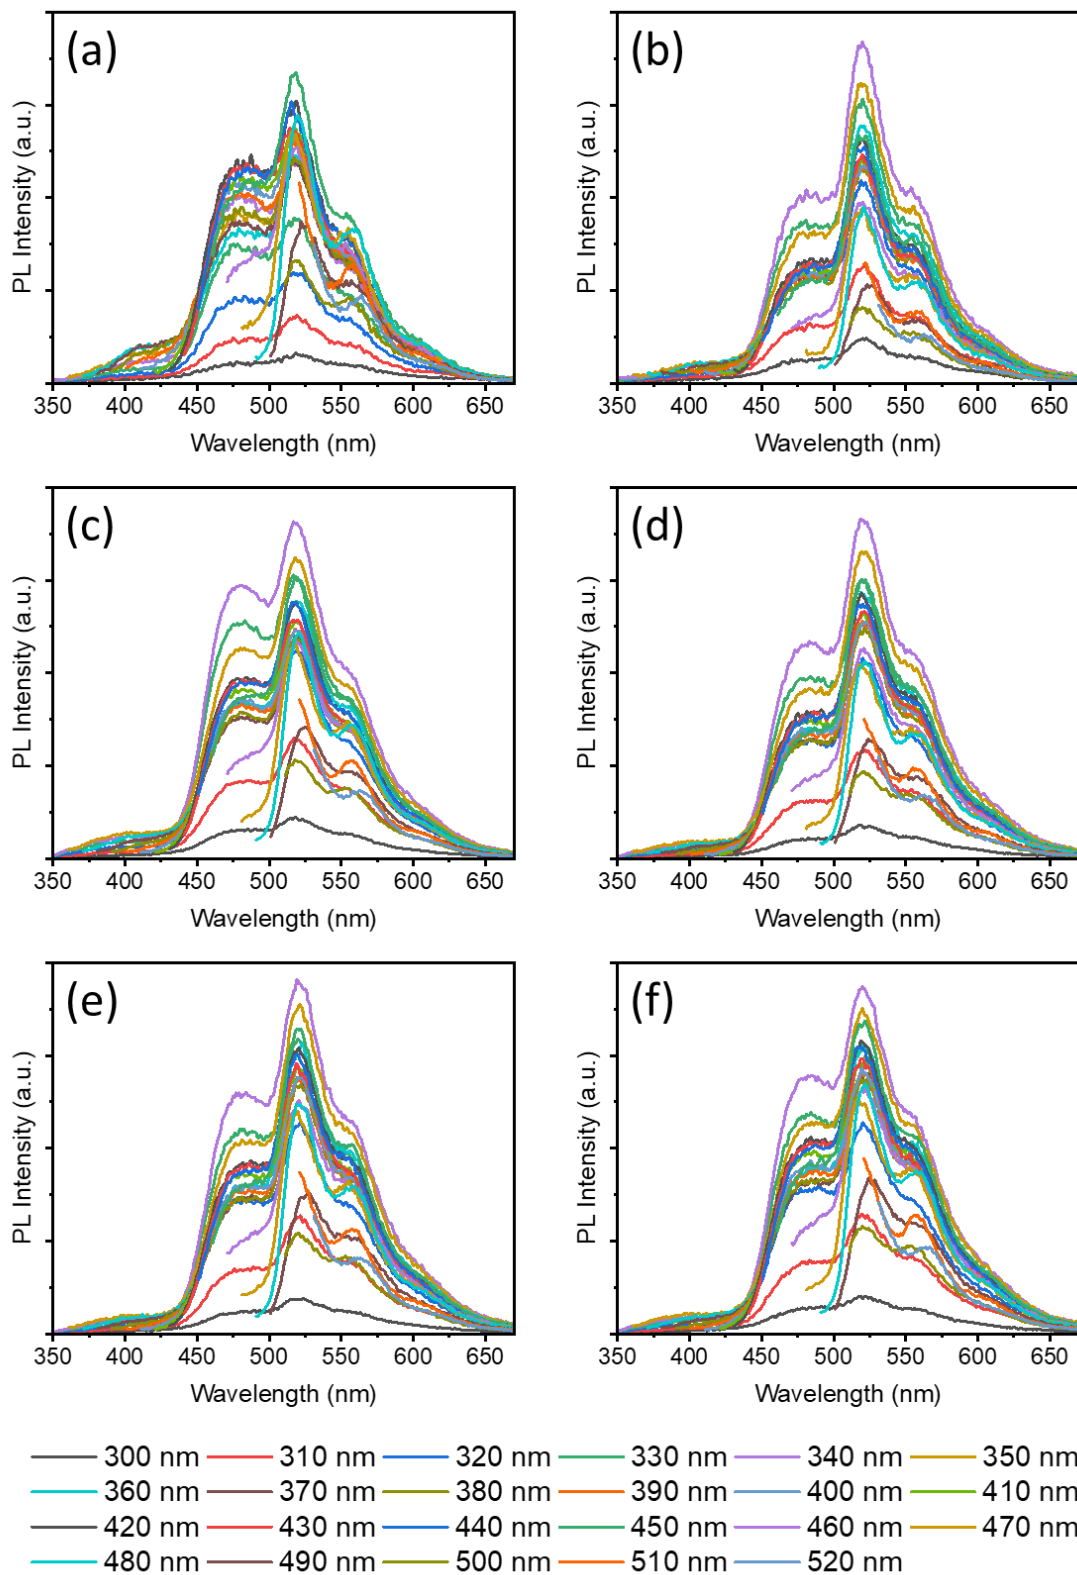

**Figure S2:** Emission spectra of BPD mixed in PMMA at different concentrations (a) 0.10 wt. %, (b) 0.25 wt. %, (c) 0.50 wt. %, (d) 0.75 wt. %, (e) 1.00 wt. %, and (g) 2.00 wt. % recorded using different excitation wavelengths ranging from 300 nm to 520 nm.

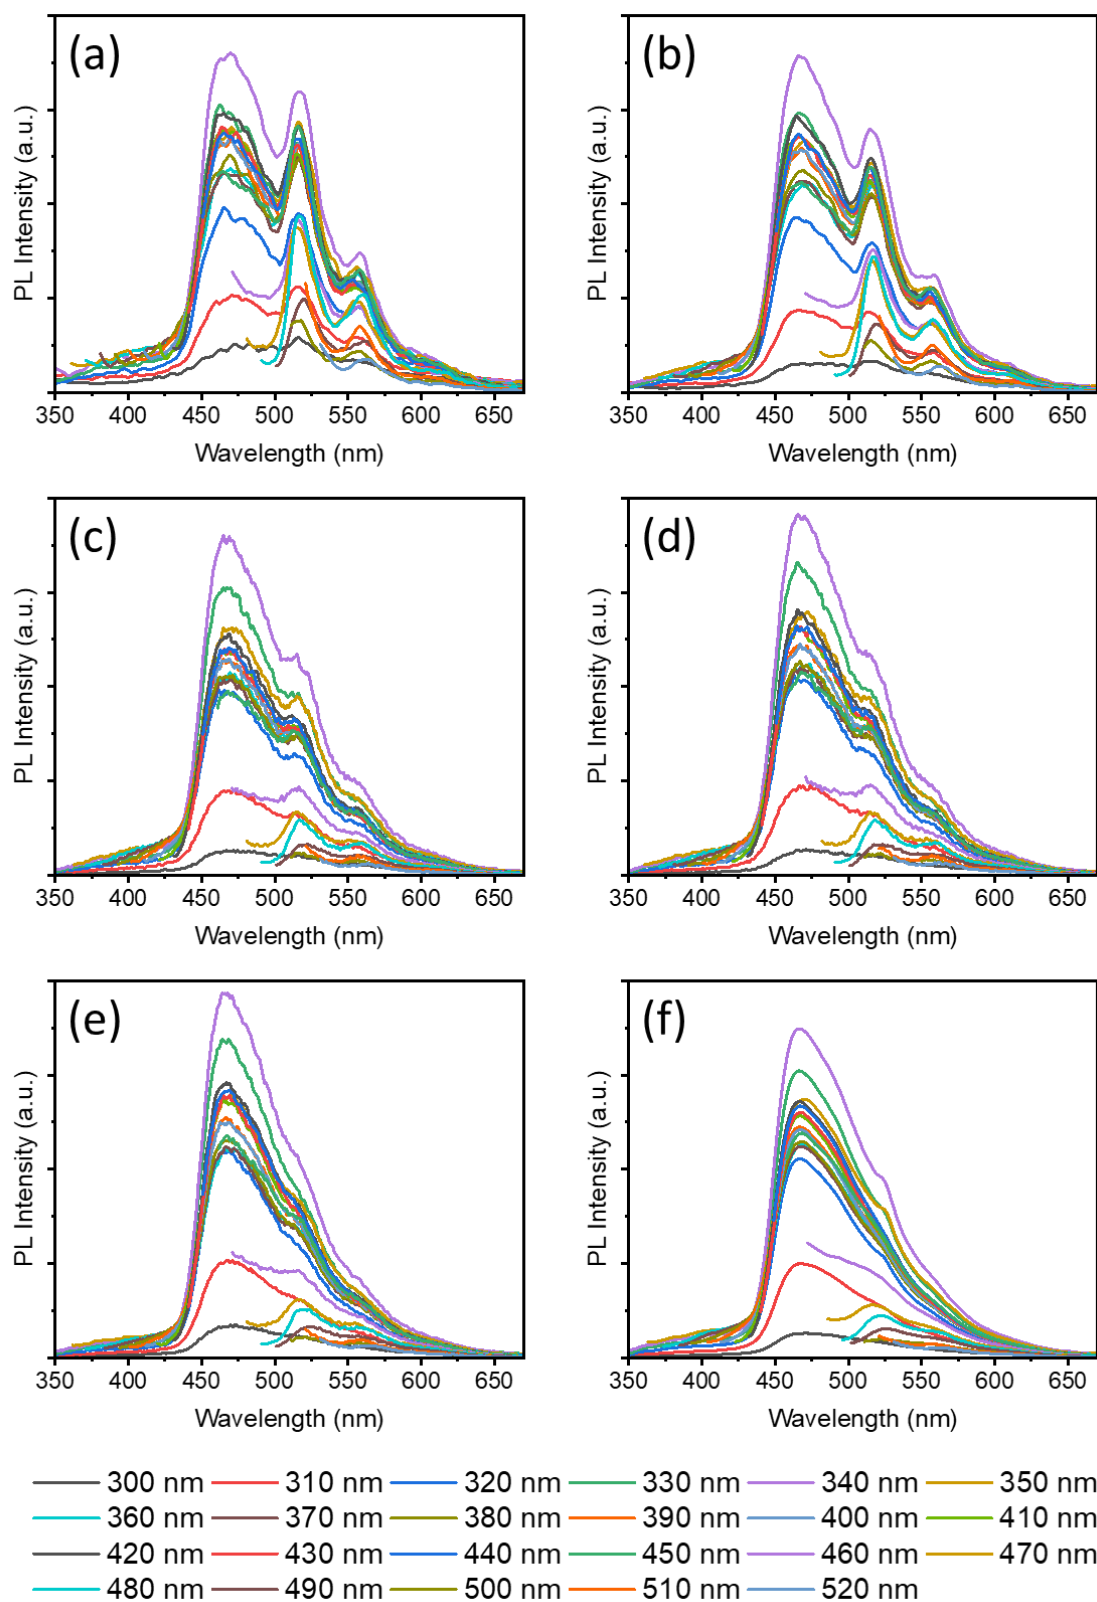

**Figure S3:** Emission spectra of BPD mixed in PS at different concentrations (a) 0.10 wt. %, (b) 0.25 wt. %, (c) 0.50 wt. %, (d) 0.75 wt. %, (e) 1.00 wt. %, and (g) 2.00 wt. % recorded using different excitation wavelengths ranging from 300 nm to 520 nm.

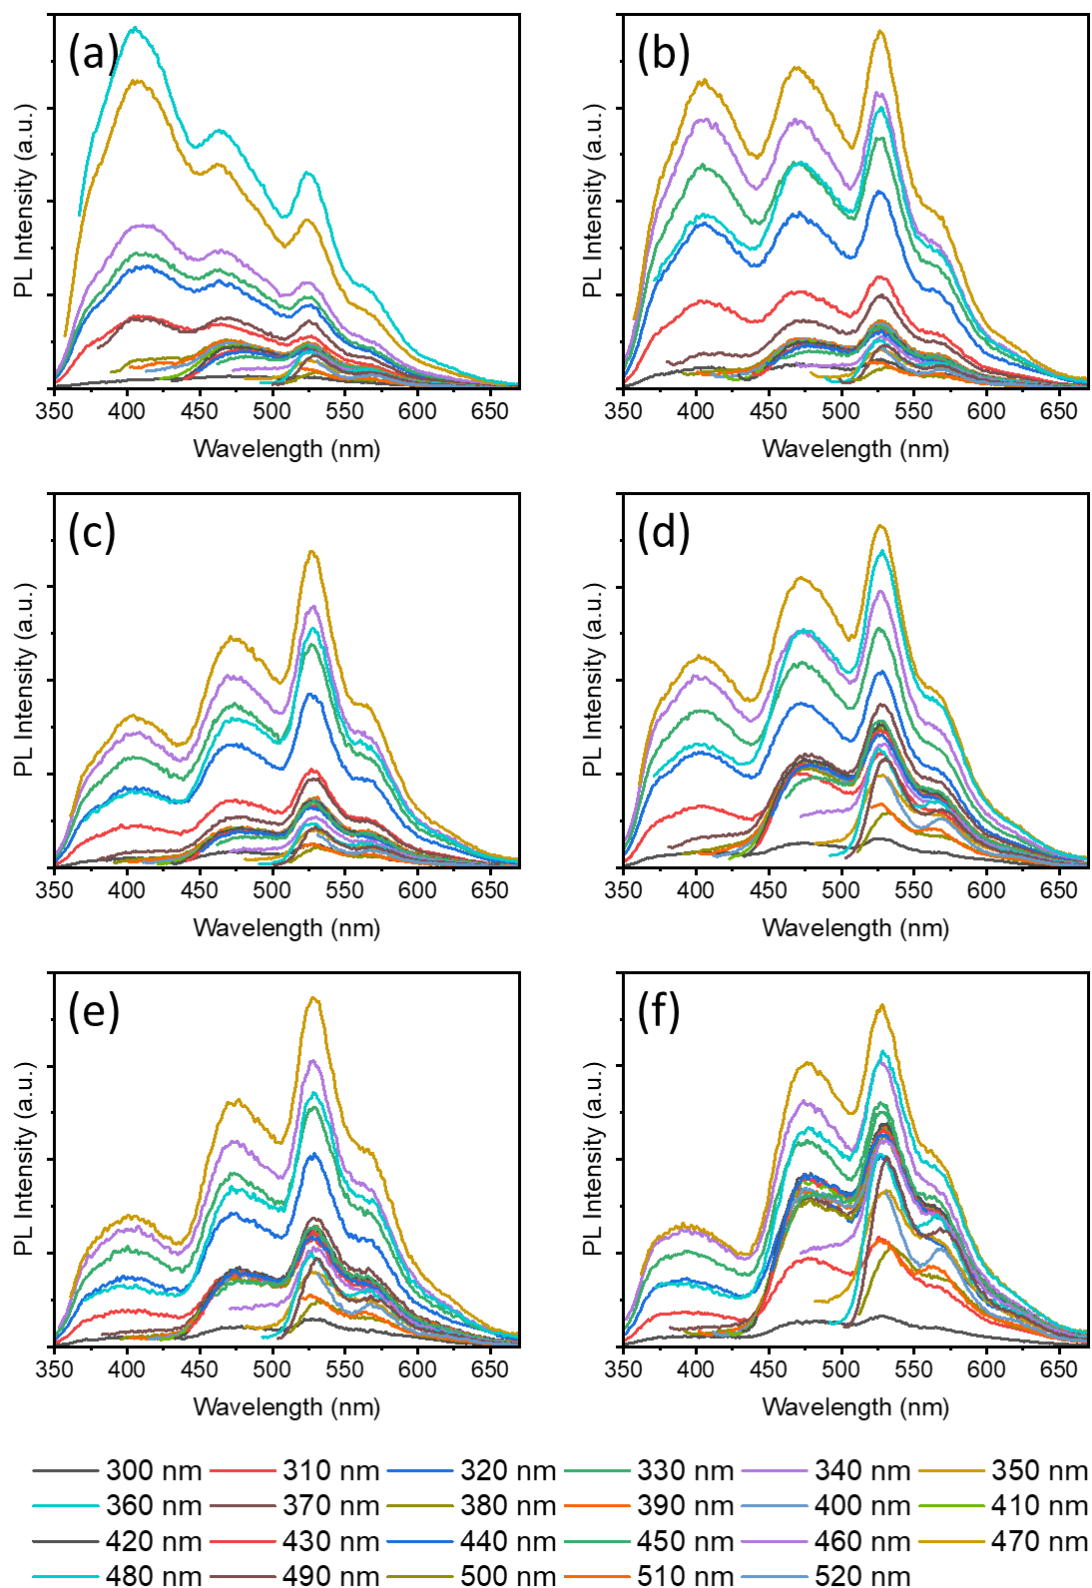

**Figure S4:** Emission spectra of BPD mixed in PVK at different concentrations (a) 0.10 wt. %, (b) 0.25 wt. %, (c) 0.50 wt. %, (d) 0.75 wt. %, (e) 1.00 wt. %, and (g) 2.00 wt. % recorded using different excitation wavelengths ranging from 300 nm to 520 nm.

**Table S1:** Performance parameters of a few single types of carbon-dots-based optically driven LEDs.

| Ref              | Chip   | CIE        | CRI  | LE (lm/W)                          | Driving Voltage (V) | Solid-state PLQY (%) |
|------------------|--------|------------|------|------------------------------------|---------------------|----------------------|
| 1                | UV     | 0.29, 0.30 | 83   | 0.086<br>(4993 cd/m <sup>2</sup> ) | 4                   | < 10                 |
| 2                | 400 nm | 0.42, 0.38 | 91   | -                                  | -                   | 10                   |
| 3                | 450    | 0.34, 0.36 | 92.3 | 7.19                               | 2.5                 | -                    |
| 4                | UV     | 0.31, 0.32 | 85   | 8.8                                | -                   | -                    |
| 5                | UV     | 0.31, 0.36 | 84   | -                                  | 3.5                 | -                    |
| 6                | 395 nm | 0.35, 0.33 | 87   | -                                  | -                   | 28                   |
| 7                | UV     | 0.32, 0.36 | 67.4 | 15.5                               | 3                   | 15.5                 |
| 8                | 450 nm | 0.33, 0.34 | 79   | 5.9                                | -                   | 25                   |
| 9                | UV     | 0.33, 0.35 | 98.3 | 1.23                               | -                   | 78.5                 |
| <b>This work</b> | 445 nm | 0.35, 0.37 | 71   | 3.8                                | 10                  | 75.9                 |

**Ref:** Reference. **CIE:** International Commission on Illumination coordinates. **CRI:** Color Rendering Index. **LE:** luminous efficiency.

#### References:

1. T. Feng, Q. Zeng, S. Lu, X. Yan, J. Liu, S. Tao, M. Yang and B. Yang, Color-Tunable Carbon Dots Possessing Solid-State Emission for Full-Color Light-Emitting Diodes Applications, *ACS Photonics*, 2018, **5**, 502-510.
2. T. Meng, T. Yuan, X. Li, Y. Li, L. Fan and S. Yang, Ultrabroad-band, red sufficient, solid white emission from carbon quantum dot aggregation for single component warm white light emitting diodes with a 91 high color rendering index, *Chemical Communications*, 2019, **55**, 6531-6534.
3. M. Chen, L. Guan, H. Ma, Y. Zhang, Y. Chang, F. Wang, Z. Liu and X. Li, Spectral Regulation of Carbon Dots and the Realization of Single-Component Solar-Simulated White Light-Emitting Diodes, *ACS Photonics*, 2023, **10**, 2730-2738.
4. K. Yuan, X. Zhang, R. Qin, X. Ji, Y. Cheng, L. Li, X. Yang, Z. Lu and H. Liu, Surface state modulation of red emitting carbon dots for white light-emitting diodes, *Journal of Materials Chemistry C*, 2018, **6**, 12631-12637.
5. F. Zhang, X. Feng, Y. Zhang, L. Yan, Y. Yang and X. Liu, Photoluminescent carbon quantum dots as a directly film-forming phosphor towards white LEDs, *Nanoscale*, 2016, **8**, 8618-8632.
6. Y. Li, Q. Li, S. Meng, Y. Qin, D. Cheng, H. Gu, Z. Wang, Y. Ye and J. Tan, Ultrabroad-band, white light emission from carbon dot-based materials with hybrid fluorescence/phosphorescence for single component white light-emitting diodes, *Chinese Chemical Letters*, 2023, **34**, 107794.
7. K. Xu, M. Zheng, H. Ma, B. Zhao, H. Jia, C. Zhang, Z. Ren, C. Li and Z. a. Tan, Solvent-free synthesis of oil-soluble fluorescent carbon dots for bright photoluminescent and electroluminescent light-emitting diodes, *Chemical Engineering Journal*, 2023, **470**, 144112.
8. Z. Zhou, P. Tian, X. Liu, S. Mei, D. Zhou, D. Li, P. Jing, W. Zhang, R. Guo, S. Qu and A. L. Rogach, Hydrogen Peroxide-Treated Carbon Dot Phosphor with a Bathochromic-Shifted, Aggregation-Enhanced Emission for Light-Emitting Devices and Visible Light Communication, *Advanced Science*, 2018, **5**, 1800369.

9. L. Zhou, H. Wang, H. Yu, E. Amador, J. Xue, S. Wang and W. Chen, White light emitting diodes with a high colour rendering index of 98.3 using blue emissive carbon dots, *Journal of Materials Chemistry C*, 2023, **11**, 15926-15933.
